# Supplementary material
Source: ML conference proceedings conference paper supplement (https://proceedings.neurips.cc/paper_files/paper/2017/hash/743394beff4b1282ba735e5e3723ed74-Abstract.html)
Supplement: Supplementary file [file 743394beff4b1282ba735e5e3723ed74-Supplemental.zip]

---

# A Minimax Optimal Algorithm for Crowdsourcing Supplementary Material

---

**Thomas Bonald**  
Telecom ParisTech  
thomas.bonald@telecom-paristech.fr

**Richard Combes**  
Centrale-Supelec / L2S  
richard.combes@supelec.fr

## Abstract

We here provide the proofs of the two main results of the paper, and provide a more in-depth discussion on the relation between our upper bound and that of [Zhang et al., 2014].

## 1 Proof of Theorem 1

We use the following inequality between the Kullback-Leibler and  $\chi^2$  divergences.

**Lemma 1** *The Kullback-Leibler divergence of any two discrete distributions  $P, Q$  satisfies*

$$D(P||Q) \leq \mathbb{E} \left( \frac{(P(X) - Q(X))^2}{P(X)Q(X)} \right),$$

with  $X \sim P$ .

*Proof.* Using the inequality  $\ln(z) \leq z - 1$ , we get

$$D(P||Q) = \sum_x P(x) \ln \left( \frac{P(x)}{Q(x)} \right) \leq \sum_x P(x) \left( \frac{P(x)}{Q(x)} - 1 \right) = -1 + \sum_x \frac{P(x)^2}{Q(x)}.$$

Writing

$$P(x)^2 = Q(x)^2 + 2Q(x)(P(x) - Q(x)) + (P(x) - Q(x))^2,$$

we deduce

$$\begin{aligned} D(P||Q) &\leq -1 + \sum_x Q(x) + 2 \sum_x (P(x) - Q(x)) + \sum_x \frac{(P(x) - Q(x))^2}{Q(x)}, \\ &= \sum_x \frac{(P(x) - Q(x))^2}{Q(x)}, \\ &= \sum_x P(x) \frac{(P(x) - Q(x))^2}{P(x)Q(x)}. \end{aligned}$$

□

**Proof of Theorem 1.** Let  $X \in \{+1, 0, -1\}^n$  be any sample under parameters  $\alpha, \theta$ . We have for any distinct indices  $i, j, k \in \{1, \dots, n\}$ ,

$$\begin{aligned}\mathbb{P}((X_i, X_j, X_k) = (0, 1, 1)) &= \mathbb{P}((X_i, X_j, X_k) = (0, -1, -1)) = (1 - \alpha) \frac{\alpha^2}{4} (1 + \theta_j \theta_k), \\ \mathbb{P}((X_i, X_j, X_k) = (0, 1, -1)) &= \mathbb{P}((X_i, X_j, X_k) = (0, -1, 1)) = (1 - \alpha) \frac{\alpha^2}{4} (1 - \theta_j \theta_k), \\ \mathbb{P}((X_i, X_j, X_k) = (1, 1, 1)) &= \mathbb{P}((X_i, X_j, X_k) = (-1, -1, -1)) = \frac{\alpha^3}{8} (1 + \theta_i \theta_j + \theta_j \theta_k + \theta_k \theta_i), \\ \mathbb{P}((X_i, X_j, X_k) = (1, 1, -1)) &= \mathbb{P}((X_i, X_j, X_k) = (-1, -1, 1)) = \frac{\alpha^3}{8} (1 + \theta_i \theta_j - \theta_j \theta_k - \theta_k \theta_i).\end{aligned}$$

Now let  $a \in (0, 1)$  and

$$\theta = (1, a, a, 0, \dots, 0), \quad \theta' = (1 - 2\epsilon, \frac{a}{1 - 2\epsilon}, \frac{a}{1 - 2\epsilon}, 0, \dots, 0).$$

Observe that  $\theta, \theta' \in \Theta_{a,b}$  for any  $b \in (0, 1)$ . Denote by  $P, P'$  the distributions of  $X$  under parameters  $\theta, \theta'$ , respectively. We use Lemma 1 to get an upper bound on the Kullback-Leibler divergence  $D(P' || P)$  between  $P'$  and  $P$ . Observe that we can restrict the analysis to the case  $n = 3$ . We calculate  $P(x), P'(x)$  for all possible values of  $x \in \{-1, 0, 1\}^3$ :

- (a) If  $x_2 = 0$  or  $x_3 = 0$  then  $P(x) = P'(x)$ .
- (b) If  $x = (0, 1, 1)$  or  $x = (0, -1, -1)$ ,

$$P(x) = (1 - \alpha) \frac{\alpha^2}{4} (1 + a^2), \quad P'(x) = (1 - \alpha) \frac{\alpha^2}{4} \left( 1 + \left( \frac{a}{1 - 2\epsilon} \right)^2 \right).$$

- (c) If  $x = (0, 1, -1)$  or  $x = (0, -1, 1)$ ,

$$P(x) = (1 - \alpha) \frac{\alpha^2}{4} (1 - a^2), \quad P'(x) = (1 - \alpha) \frac{\alpha^2}{4} \left( 1 - \left( \frac{a}{1 - 2\epsilon} \right)^2 \right).$$

- (d) If  $x = (1, 1, 1)$  or  $x = (-1, -1, -1)$ ,

$$P(x) = \frac{\alpha^3}{8} (1 + 2a + a^2), \quad P'(x) = \frac{\alpha^3}{8} \left( 1 + 2a + \left( \frac{a}{1 - 2\epsilon} \right)^2 \right).$$

- (e) If  $x = (1, -1, -1)$  or  $x = (-1, 1, 1)$ ,

$$P(x) = \frac{\alpha^3}{8} (1 - 2a + a^2), \quad P'(x) = \frac{\alpha^3}{8} \left( 1 - 2a + \left( \frac{a}{1 - 2\epsilon} \right)^2 \right).$$

- (f) Otherwise,

$$P(x) = \frac{\alpha^3}{8} (1 - a^2), \quad P'(x) = \frac{\alpha^3}{8} \left( 1 - \left( \frac{a}{1 - 2\epsilon} \right)^2 \right).$$

Observing that

$$\left( \frac{a}{1 - 2\epsilon} \right)^2 - a^2 = 4\epsilon(1 - \epsilon) \left( \frac{a}{1 - 2\epsilon} \right)^2 \leq 4\epsilon \left( \frac{a}{1 - 2\epsilon} \right)^2 \leq 16a^2\epsilon,$$

we get in cases (b)-(c),

$$\frac{(P(x) - P'(x))^2}{P(x)} \leq \frac{64\alpha^2 a^4 \epsilon^2}{1 - a},$$

and in cases (d)-(f),

$$\frac{(P(x) - P'(x))^2}{P(x)} \leq \frac{32\alpha^2 a^4 \epsilon^2}{1 - a}.$$

Summing, we obtain

$$D(P' \| P) \leq \frac{512\alpha^2 a^4 \epsilon^2}{1-a}.$$

Now let  $t \leq T_1$  with  $c_1 = \frac{1}{512}$ . Denoting by  $P^t, P'^t$  the distributions of  $X(1), \dots, X(t)$  under the respective parameters  $\theta, \theta'$ , we obtain  $D(P'^t \| P^t) = tD(P' \| P) \leq \ln\left(\frac{1}{4\delta}\right)$ . Since  $\|\theta - \theta'\|_\infty = 2\epsilon$ , it follows from [Tsybakov, 2008, Theorem 2.2] that:

$$\min\left(\mathbb{P}_\theta(\|\hat{\theta} - \theta\|_\infty \geq \epsilon), \mathbb{P}_{\theta'}(\|\hat{\theta} - \theta'\|_\infty \geq \epsilon)\right) \geq \frac{1}{4 \exp(D(P'^t \| P^t))} \geq \delta.$$

Since  $\theta, \theta' \in \Theta_{a,b}$ , we get

$$\min_{\theta \in \Theta_{a,b}} \mathbb{P}\left(\|\hat{\theta} - \theta\|_\infty \geq \epsilon\right) \geq \delta.$$

Now assume that  $n > 4$  so that  $T_2 > 0$ . Let  $m = n - 4$  and  $c = b/m$ . Consider the two parameters

$$\theta = (a, a, -a, -a, c, \dots, c), \quad \theta' = (-a, -a, a, a, c, \dots, c).$$

Observe that  $\theta, \theta' \in \Theta_{a,b}$ . Denote by  $P$  and  $P'$  the distributions of  $X$  under parameters  $\theta, \theta'$ , respectively. Again, we use Lemma 1 to get an upper bound on the Kullback-Leibler divergence between  $P$  and  $P'$ .

Define  $y = (1, 1, -1, -1)$ ,  $k^+ = \sum_{i=1}^4 \mathbf{1}\{x_i = y_i\}$ ,  $k^- = \sum_{i=1}^4 \mathbf{1}\{x_i = -y_i\}$ ,  $k = k^+ + k^-$ ,  $h = k^+ - k^- = x_1 + x_2 - x_3 - x_4$ ,  $\ell^+ = \sum_{i>4} \mathbf{1}\{x_i = +1\}$  and  $\ell^- = \sum_{i>4} \mathbf{1}\{x_i = -1\}$ , and  $\ell = \ell^+ + \ell^-$ . We have:

$$\begin{aligned} P(x) &= \frac{1}{2^{k+\ell}} \alpha^{k+\ell} (1-\alpha)^{n-k-\ell} \left( (1+a)^{k^+} (1-a)^{k^-} p_{\ell^+, \ell^-} + (1+a)^{k^-} (1-a)^{k^+} p_{\ell^-, \ell^+} \right), \\ &= \frac{1}{2^{k+\ell}} \alpha^{k+\ell} (1-\alpha)^{n-k-\ell} (1+a)^{k^-} (1-a)^{k^+} \left( (1+a)^h p_{\ell^+, \ell^-} + (1-a)^h p_{\ell^-, \ell^+} \right). \end{aligned}$$

and

$$\begin{aligned} P'(x) &= \frac{1}{2^{k+\ell}} \alpha^{k+\ell} (1-\alpha)^{n-k-\ell} \left( (1+a)^{k^+} (1-a)^{k^-} p_{\ell^-, \ell^+} + (1+a)^{k^-} (1-a)^{k^+} p_{\ell^+, \ell^-} \right), \\ &= \frac{1}{2^{k+\ell}} \alpha^{k+\ell} (1-\alpha)^{n-k-\ell} (1+a)^{k^-} (1-a)^{k^+} \left( (1+a)^h p_{\ell^-, \ell^+} + (1-a)^h p_{\ell^+, \ell^-} \right), \end{aligned}$$

where

$$\forall i, j \in \mathbb{N}, \quad p_{i,j} = (1+c)^i (1-c)^j,$$

Define:

$$F(x) = \frac{(P(x) - P'(x))^2}{P(x)P'(x)}$$

We have:

$$F(x) = \frac{((1+a)^h - (1-a)^h)^2 (p_{\ell^-, \ell^+} - p_{\ell^+, \ell^-})^2}{((1+a)^h p_{\ell^-, \ell^+} + (1-a)^h p_{\ell^+, \ell^-})((1+a)^h p_{\ell^+, \ell^-} + (1-a)^h p_{\ell^-, \ell^+})}$$

Notice that  $F$  is invariant (a) when  $h$  is replaced by  $-h$  and (b) when one exchanges  $\ell^+$  and  $\ell^-$ . So we can assume that  $h > 0$  and  $\ell^+ \geq \ell^-$ , so that  $p_{\ell^+, \ell^-} \geq p_{\ell^-, \ell^+}$ . Now:

$$F(x) \leq \frac{((1+a)^h - (1-a)^h)^2 (p_{\ell^+, \ell^-} - p_{\ell^-, \ell^+})^2}{(1-a)^h (1+a)^h p_{\ell^+, \ell^-}^2}.$$

Define  $\eta = (1-c)/(1+c)$ . Then:

$$\frac{(p_{\ell^+, \ell^-} - p_{\ell^-, \ell^+})^2}{p_{\ell^+, \ell^-}^2} = \left(1 - \eta^{\ell^+ - \ell^-}\right)^2 \leq (\ell^+ - \ell^-)^2 (1-\eta)^2 = (\ell^+ - \ell^-)^2 \frac{4c^2}{(1+c)^2} \leq 4c^2 (\ell^+ - \ell^-)^2.$$

Moreover, using the fact that  $h \leq 4$ ,

$$\frac{((1+a)^h - (1-a)^h)^2}{(1-a)^h (1+a)^h} \leq \frac{((1+a)^4 - (1-a)^4)^2}{(1-a)^4} = \frac{(4a(1+a^2))^2}{(1-a)^4} \leq 64 \frac{a^2}{(1-a)^4}.$$

By Lemma 1,

$$D(P||P') \leq \mathbb{E}(F(X)) \leq 256 \frac{a^2 c^2}{(1-a)^4} \mathbb{E}(h^2(X)(\ell^+(X) - \ell^-(X))^2),$$

where  $X$  has distribution  $P$  and we make explicit the dependency of  $h, \ell^+, \ell^-$  in the state  $X$ . The random quantity  $h^2(X)(\ell^+(X) - \ell^-(X))^2$  does not change when  $X$  is replaced by  $-X$ , so:

$$\mathbb{E}(h^2(X)(\ell^+(X) - \ell^-(X))^2) = \mathbb{E}(h^2(X))\mathbb{E}((\ell^+(X) - \ell^-(X))^2).$$

Now

$$\mathbb{E}(h^2(X)) = \text{var}(h(X)) = \text{var}(h(X)|G=1) = 4\text{var}(X_1|G=1) = 4\alpha(1-\alpha a^2)$$

and

$$\begin{aligned} \mathbb{E}((\ell^+(X) - \ell^-(X))^2) &= \text{var}(\ell^+(X) - \ell^-(X)), \\ &= \text{var}(\ell^+(X) - \ell^-(X)|G=1), \\ &= m\text{var}(X_5|G=1) = m\alpha(1-\alpha c^2) \end{aligned}$$

so that

$$D(P||P') \leq 1024 \frac{m\alpha^2 a^2 c^2}{(1-a)^4} = 1024 \frac{\alpha^2 a^2 b^2}{m(1-a)^4}.$$

Now let  $t \leq T_2$  with  $c_2 = \frac{1}{1024}$ . Denoting by  $P^t, P'^t$  the distributions of  $X(1), \dots, X(t)$  under the respective parameters  $\theta, \theta'$ , we obtain  $D(P^t||P'^t) = tD(P||P') \leq \ln\left(\frac{1}{4\delta}\right)$ . Since  $\|\theta - \theta'\|_\infty = 2a$ , it follows from [Tsybakov, 2008, Theorem 2.2] that:

$$\min\left(\mathbb{P}_\theta(\|\hat{\theta} - \theta\|_\infty \geq a), \mathbb{P}_{\theta'}(\|\hat{\theta} - \theta'\|_\infty \geq a)\right) \geq \frac{1}{4 \exp(D(P^t||P'^t))} \geq \delta.$$

Since  $\theta, \theta' \in \Theta_{a,b}$  and  $a \geq \epsilon$ , we get

$$\min_{\theta \in \Theta_{a,b}} \mathbb{P}\left(\|\hat{\theta} - \theta\|_\infty \geq \epsilon\right) \geq \delta.$$

□

## 2 Proof of Theorem 2

We use the following preliminary results.

**A concentration inequality.** Define:

$$\|\hat{C} - C\|_\infty = \max_{i,j:i \neq j} |\hat{C}_{ij} - C_{ij}|.$$

**Lemma 2** *We have:*

(i) *For all  $i = 1, \dots, n$  and all  $\varepsilon > 0$ ,*

$$\mathbb{P}\left(\sum_{j \neq i} |\hat{C}_{ij} - C_{ij}| \geq \varepsilon\right) \leq 2 \exp\left(-\frac{\varepsilon^2 \alpha^2 t}{30 \max(B(\theta)^2, n)}\right) + 2n \exp\left(-\frac{t\alpha^2}{8(n-1)}\right).$$

(ii) *For all  $j \neq i$  and all  $\varepsilon \in (0, 1)$ ,*

$$\mathbb{P}(|\hat{C}_{ij} - C_{ij}| \geq \varepsilon) \leq 2 \exp\left(-\frac{\varepsilon^2 \alpha^2 t}{120}\right) + 4 \exp\left(-\frac{t\alpha^2}{8}\right).$$

(iii) *For all  $\varepsilon \in (0, 1)$ ,*

$$\mathbb{P}(\|\hat{C} - C\|_\infty \geq \varepsilon) \leq 3n^2 \exp\left(-\frac{\varepsilon^2 \alpha^2 t}{120}\right).$$

*Proof.* We first prove (i). Let  $\bar{Z} = \sum_{j \neq i} (\hat{C}_{ij} - C_{ij})$ , for some fixed  $i$ . The distribution of  $\bar{Z}$  is independent of  $G(1), \dots, G(t)$  so we fix  $G(1) = \dots = G(t) = 1$  until the end of the proof. Note that, given  $G(t) = 1$ , the random variables  $X_1(t), \dots, X_n(t)$  are independent, with respective expectations  $\theta_1, \dots, \theta_n$ . Let  $U = (U_j(t))_{j,t}$  be i.i.d Bernoulli random variables with  $\mathbb{E}(U_j(t)) = \alpha$  and  $V = (V_j(t))_{j,t}$  be independent random variables on  $\{-1, 1\}$  with  $\mathbb{E}(V_j(t)) = \theta_j$ . Then  $(X_j(t))_{j,t}$  has the same distribution as  $(U_j(t)V_j(t))_{j,t}$ . Define:

$$Z(s) = \frac{U_i(s)U_j(s)V_i(s)V_j(s)}{N_j},$$

with

$$N_j = \sum_{s=1}^t U_i(s)U_j(s).$$

Observe that  $\bar{Z}$  has the same distribution as  $\sum_{s=1}^t Z(s)$ .

### Conditioning

Let us first condition on  $U$ . We denote by  $\mathbb{E}_U$  and  $\mathbb{P}_U$  the corresponding conditional expectation and probability. We upper bound the cumulant generating function of  $Z(s)$ . Consider  $s$  fixed and drop  $s$  for clarity. Consider  $\lambda \in \mathbb{R}$  and:

$$\begin{aligned} \ln(\mathbb{E}_U(e^{\lambda Z} | V_i)) &= \ln(\mathbb{E}_U(e^{\lambda U_i V_i \sum_{j \neq i} U_j V_j / N_j} | V_i)) \\ &= \sum_{j \neq i} \ln(\mathbb{E}_U(e^{\lambda U_i U_j V_i V_j / N_j} | V_i)) \\ &\leq \sum_{j \neq i} \ln(\mathbb{E}_U(e^{\lambda U_i U_j V_i \theta_j / N_j + \lambda^2 U_i U_j / (2N_j^2)} | V_i)) \\ &= \lambda^2 \sum_{j \neq i} \frac{U_i U_j}{2N_j^2} + \ln(\mathbb{E}_U(e^{\lambda U_i V_i \sum_{j \neq i} U_j \theta_j / N_j} | V_i)), \end{aligned}$$

using the independence of  $V_1, \dots, V_n$ , and the fact that, if  $Y$  is a random variable with  $|Y| \leq 1$ , then  $\ln(\mathbb{E}(e^{\lambda Y})) \leq \lambda \mathbb{E}(Y) + \lambda^2/2$  by Hoeffding's lemma. Taking expectation over  $V_i$ :

$$\ln(\mathbb{E}_U(e^{\lambda U_i V_i \sum_{j \neq i} U_j \theta_j / N_j})) \leq \lambda \sum_{j \neq i} \frac{U_i U_j \theta_j}{N_j} + \frac{\lambda^2}{2} \left( \sum_{j \neq i} \frac{U_i U_j \theta_j}{N_j} \right)^2,$$

where we have used Hoeffding's lemma once again. Putting it together, we have proven:

$$\ln(\mathbb{E}_U(e^{\lambda Z})) \leq \lambda \sum_{j \neq i} \frac{U_i U_j \theta_j}{N_j} + \frac{\lambda^2}{2} \left( \sum_{j \neq i} \frac{U_i U_j}{N_j^2} + \left( \sum_{j \neq i} \frac{U_i U_j \theta_j}{N_j} \right)^2 \right).$$

Define  $N = \min_{j \neq i} N_j$ ,  $S = \sum_{s=1}^t \left( \sum_{j \neq i} U_i(s)U_j(s)\theta_j \right)^2$  and  $\sigma^2 = \frac{(n-1)N+S}{N^2}$ . It is noted that  $N, S$  and  $\sigma^2$  depend on  $(U_j(t))_{j,t}$  but not on  $(V_j(t))_{j,t}$ .

Using independence,

$$\begin{aligned} \ln(\mathbb{E}_U(e^{\lambda \bar{Z}})) &= \sum_{s=1}^t \ln(\mathbb{E}_U(e^{\lambda Z(s)})), \\ &\leq \lambda \mathbb{E}(\bar{Z}) + \frac{\lambda^2}{2} \left( \sum_{j \neq i} \frac{1}{N_j} + \sum_{s=1}^t \left( \sum_{j \neq i} \frac{U_i(s)U_j(s)\theta_j}{N_j} \right)^2 \right), \\ &\leq \lambda \mathbb{E}(\bar{Z}) + \frac{\lambda^2 \sigma^2}{2}, \end{aligned}$$

where we used the fact that  $\mathbb{E}_U(\bar{Z}) = \mathbb{E}(\bar{Z}) = \theta_i \sum_{j \neq i} \theta_j$ .

### Chernoff bound

We now derive a Chernoff bound for  $\bar{Z}$ . For all  $\varepsilon > 0$ , we have

$$\mathbb{P}_U(\bar{Z} - \mathbb{E}(\bar{Z}) \geq \varepsilon) \leq \min_{\lambda \geq 0} e^{-\lambda \varepsilon} \mathbb{E}_U(e^{\lambda(\bar{Z} - \mathbb{E}(\bar{Z}))}) \leq \min_{\lambda \geq 0} e^{-\lambda \varepsilon + \lambda^2 \sigma^2 / 2} = e^{-\varepsilon^2 / \sigma^2},$$

the minimum being attained for  $\lambda = 2\varepsilon / \sigma^2$ .

### Controlling the fluctuations of $\sigma^2$

To remove the conditioning on  $U$ , so that we need to control the fluctuations of  $\sigma^2$ , thus those of  $N$  and  $S$ . First consider  $N$ . Since  $N_j$  is the sum of  $t$  independent Bernoulli variables with expectation  $\alpha^2$ , we have by Lemma 3,

$$\mathbb{P}(N_j \leq \alpha^2 t / 2) \leq e^{-\frac{t\alpha^2}{8}}.$$

Using a union bound,

$$\mathbb{P}(N \leq \alpha^2 t / 2) \leq \sum_{j \neq i} \mathbb{P}(N_j \leq \alpha^2 t / 2) \leq (n-1)e^{-\frac{t\alpha^2}{8}}.$$

We turn to  $S$ .  $S$  is a sum of  $t$  positive independent variables bounded by  $(n-1)^2$  with expectation

$$\mu = \mathbb{E} \left( \sum_{j \neq i} U_i(t) U_j(t) \theta_j \right)^2 = \alpha^2 (\alpha B_i(\theta)^2 + (1-\alpha) \sum_{j \neq i} \theta_j^2),$$

where  $B_i(\theta) = \sum_{j \neq i} \theta_j$ . We have  $\mu \leq \bar{\mu} \equiv \alpha^2 \max(B_i(\theta)^2, n-1)$ . By Lemma 3,

$$\begin{aligned} \mathbb{P}(S \geq 2t\bar{\mu}) &= \mathbb{P} \left( \frac{S}{(n-1)^2} \geq \frac{2t\bar{\mu}}{(n-1)^2} \right) \\ &\leq \exp \left( -tD \left( \frac{2\bar{\mu}}{(n-1)^2} \parallel \frac{\mu}{(n-1)^2} \right) \right) \\ &\leq \exp \left( -tD \left( \frac{2\bar{\mu}}{(n-1)^2} \parallel \frac{\bar{\mu}}{(n-1)^2} \right) \right) \\ &\leq e^{-\frac{t\bar{\mu}}{3(n-1)^2}} \\ &\leq e^{-\frac{t\alpha^2}{3(n-1)}}. \end{aligned}$$

If both events  $S \leq 2t\bar{\mu}$  and  $N \geq \alpha^2 t / 2$  occur we have:

$$\sigma^2 \leq \frac{2(n-1)}{\alpha^2 t} + \frac{8 \max(B_i(\theta)^2, n-1)}{\alpha^2 t} \leq \frac{10 \max(B_i(\theta)^2, n-1)}{\alpha^2 t}.$$

### Estimation Error

Finally,

$$\begin{aligned} \mathbb{P}(\bar{Z} - \mathbb{E}(\bar{Z}) \geq \varepsilon) &\leq \mathbb{P} \left( \bar{Z} - \mathbb{E}(\bar{Z}) \geq \varepsilon, \sigma^2 \leq \frac{10 \max(B_i(\theta)^2, n-1)}{\alpha^2 t} \right) + \mathbb{P}(N \leq \alpha^2 t / 2) + \mathbb{P}(S \geq 2t\bar{\mu}) \\ &\leq \exp \left( -\frac{\varepsilon^2 \alpha^2 t}{10 \max(B_i(\theta)^2, n-1)} \right) + (n-1) \exp \left( -\frac{t\alpha^2}{8} \right) + \exp \left( -\frac{t\alpha^2}{3(n-1)} \right) \\ &\leq \exp \left( -\frac{\varepsilon^2 \alpha^2 t}{10 \max(B_i(\theta)^2, n-1)} \right) + n \exp \left( -\frac{t\alpha^2}{8(n-1)} \right). \end{aligned}$$

Doing the same reasoning for  $\mathbb{P}(\bar{Z} - \mathbb{E}(\bar{Z}) \leq -\varepsilon)$  yields

$$\mathbb{P}(|\bar{Z} - \mathbb{E}(\bar{Z})| \geq \varepsilon) \leq 2 \exp \left( -\frac{\varepsilon^2 \alpha^2 t}{10 \max(B_i(\theta)^2, n-1)} \right) + 2n \exp \left( -\frac{t\alpha^2}{8(n-1)} \right).$$

Statement (i) then follows from the fact that  $\max(B_i(\theta)^2, n-1) \leq 3 \max(B(\theta)^2, n)$ . Indeed,  $\max(B_i(\theta)^2, n-1) \leq \max(B_i(\theta)^2, 3n)$ , and if  $B_i(\theta) \geq \sqrt{3n} \geq 3$ ,

$$\frac{B_i(\theta)^2}{B(\theta)^2} \leq \frac{B_i(\theta)^2}{(B_i(\theta) - 1)^2} \leq \frac{9}{4} \leq 3.$$

Statement (ii) is obtained by setting  $n = 2$  in statement (i); statement (iii) follows from a union bound over all pairs  $i, j$  of statement (ii), on observing that

$$\mathbb{P}(|\hat{C}_{ij} - C_{ij}| \geq \varepsilon) \leq 6 \exp\left(-\frac{\varepsilon^2 \alpha^2 t}{120}\right).$$

□

**Lemma 3 (Chernoff's Inequality)** *Let  $Y_1, \dots, Y_t$  be i.i.d. random variables on  $[0, 1]$  with expectation  $\mu$ . Denote by  $D(\mu' || \mu)$  the Kullback Leibler divergence between two Bernoulli distribution with parameters  $\mu'$  and  $\mu$ .*

- (i) For all  $\mu' \geq \mu$ ,  $\mathbb{P}(\sum_{s=1}^t Y_s \geq t\mu') \leq e^{-tD(\mu' || \mu)}$ .
- (ii) For all  $\mu' \leq \mu$ ,  $\mathbb{P}(\sum_{s=1}^t Y_s \leq t\mu') \leq e^{-tD(\mu' || \mu)}$ .
- (iii) For all  $\mu \geq 0$ ,  $D(2\mu || \mu) \geq \mu/2$  and  $D(\mu/2 || \mu) \geq \mu/8$ .

**Estimation of absolute value.** For all  $i \neq j \neq k$ , define

$$\rho_k(i, j) = \sqrt{\left| \frac{\hat{C}_{ik} \hat{C}_{jk}}{\hat{C}_{ij}} \right|}.$$

**Lemma 4** *If  $\|\hat{C} - C\|_\infty \leq \varepsilon$ , then*

$$|\rho_k(i, j) - |\theta_k|| \leq 10 \frac{\varepsilon}{|C_{ij}|}.$$

*Proof.* Without loss of generality, assume that  $|\theta_i| \geq |\theta_j|$  so that  $|C_{ik}| \geq |C_{jk}|$ .

a) If  $\varepsilon \geq |C_{ij}|/2$ , the inequality holds since  $10 \frac{\varepsilon}{|C_{ij}|} \geq 5$  and  $|\rho_k(i, j) - |\theta_k|| \leq 2$ .

b) Assume  $\varepsilon \leq |C_{ij}|/2$  and  $\varepsilon \leq |C_{jk}|/2$ . Then

$$\theta_k = C_{jk}/|\theta_j| \leq 2\varepsilon/|\theta_j| \leq 2\varepsilon/|C_{ij}|.$$

Furthermore,  $|\hat{C}_{jk}| \leq |C_{jk}| + \varepsilon$ ,  $|\hat{C}_{ik}| \leq |C_{ik}| + \varepsilon$  and  $|\hat{C}_{ij}| \geq |C_{ij}| - \varepsilon \geq |C_{ij}|/2$ . So

$$\begin{aligned} \rho_k(i, j) &\leq \sqrt{2(|C_{ik}| + \varepsilon)(|C_{jk}| + \varepsilon)/C_{ij}} = \sqrt{2(|\theta_k| + \frac{\varepsilon}{|\theta_i|})(|\theta_k| + \frac{\varepsilon}{|\theta_j|})} \\ &\leq 2|\theta_k| + 2\varepsilon\left(\frac{1}{|\theta_i|} + \frac{1}{|\theta_j|}\right) \leq 2|\theta_k| + \frac{4\varepsilon}{|C_{ij}|} \end{aligned}$$

and

$$|\rho_k(i, j) - |\theta_k|| \leq |\rho_k(i, j)| + |\theta_k| \leq 3|\theta_k| + \frac{4\varepsilon}{|C_{ij}|} \leq 10 \frac{\varepsilon}{|C_{ij}|}.$$

c) Finally, let  $\varepsilon \leq \min(|C_{ij}|, |C_{ik}|, |C_{jk}|)/2$ . Define

$$\Delta = |C_{ik} C_{jk} \hat{C}_{ij} - \hat{C}_{ik} \hat{C}_{jk} C_{ij}|.$$

We have

$$\begin{aligned} \Delta &\leq |C_{ik} C_{jk}| |\hat{C}_{ij} - C_{ij}| + |C_{ij} \hat{C}_{ik}| |\hat{C}_{jk} - C_{jk}| + |C_{ij} C_{jk}| |\hat{C}_{ik} - C_{ik}|, \\ &\leq \varepsilon(|C_{ik} C_{jk}| + 2|C_{ij} C_{ik}| + |C_{ij} C_{jk}|). \end{aligned}$$

Further,

$$|\rho_k(i, j)^2 - \theta_k^2| = \frac{\Delta}{|\hat{C}_{ij} C_{ij}|} \leq \frac{2\Delta}{C_{ij}^2} \leq \frac{2\varepsilon}{|C_{ij}|} (\theta_k^2 + 2|\theta_i \theta_k| + |\theta_j \theta_k|) \leq \frac{8\varepsilon|\theta_k|}{|C_{ij}|}.$$

Finally,  $\rho_k(i, j)^2 - \theta_k^2 = (\rho_k(i, j) + |\theta_k|)(\rho_k(i, j) - |\theta_k|)$ , so that

$$||\rho_k(i, j)| - |\theta_k|| \leq \frac{|\rho_k(i, j)^2 - \theta_k^2|}{\rho_k(i, j) + |\theta_k|} \leq \frac{|\rho_k(i, j)^2 - \theta_k^2|}{|\theta_k|} \leq \frac{8\varepsilon}{|C_{ij}|}.$$

□

**Lemma 5** If  $\|\hat{C} - C\|_\infty \leq \varepsilon$ , then

$$\|\hat{\theta}_k - \theta_k\| \leq \frac{20\varepsilon}{A^2(\theta)}.$$

*Proof.* a) If  $\varepsilon \geq A^2(\theta)/4$ ,

$$\|\hat{\theta}_k - \theta_k\| \leq 2 \leq 5 \leq \frac{20\varepsilon}{A^2(\theta)}$$

so that the inequality holds.

b) Consider  $\varepsilon \leq A^2(\theta)/4$ . By definition,  $\hat{\theta}_k = \rho_k(i_k, j_k)$ . By assumption, there exists  $i, j \neq k$  such that  $C_{i,j} \geq A^2(\theta)$ . Further:

$$|C_{i_k, j_k}| + \varepsilon \geq |\hat{C}_{i_k, j_k}| \geq |\hat{C}_{i, j}| \geq |C_{i, j}| - \varepsilon \geq A^2(\theta) - \varepsilon.$$

So  $C_{i_k, j_k} \geq A^2(\theta) - 2\varepsilon \geq A^2(\theta)/2$ . Using Lemma 4,

$$\|\hat{\theta}_k - \theta_k\| = |\rho_k(i_k, j_k) - \theta_k| \leq \frac{10\varepsilon}{C_{i_k, j_k}} \leq \frac{20\varepsilon}{A^2(\theta)}.$$

□

**Sign estimation.** We will use the following fact:

**Fact 1** Let  $u, v \in \mathbb{R}^n$  and define  $\epsilon = \max_i |u_i - v_i|$ ,  $\bar{u} = \max_i |u_i|$ ,  $i^* \in \arg \max_i |v_i|$ . If  $\epsilon \leq \bar{u}/4$  then (i)  $\text{sign}(v_{i^*}) = \text{sign}(u_{i^*})$  and (ii)  $|u_{i^*}| \geq \bar{u}/2$ .

*Proof.* (i) We proceed by contradiction. Assume that  $\text{sign}(u_{i^*}) \neq \text{sign}(v_{i^*})$ . Since  $i^* \in \arg \max_i |v_i|$ , we have  $|v_{i^*}| \geq \bar{u} - \epsilon$ . On the other hand, since  $\text{sign}(u_{i^*}) \neq \text{sign}(v_{i^*})$ ,  $|v_j| \leq \epsilon$ . Hence  $2\epsilon \geq \bar{u}$ , a contradiction.

(ii) We have  $|u_{i^*}| \geq |v_{i^*}| - \epsilon \geq \max_i |v_i| - \epsilon \geq \bar{u} - 2\epsilon \geq \bar{u}/2$ .

□

In the rest of the proof, we define  $\phi = \max_i |\theta_i|$ .

**Lemma 6** Assume that  $\|\hat{C} - C\|_\infty \leq \varepsilon \leq \frac{A^2(\theta)}{2}$ . Then for all  $k = 1, \dots, n$ ,

$$|\hat{\theta}_k^2 - \theta_k^2| \leq \frac{8\varepsilon\phi^2}{A^2(\theta)}.$$

*Proof.* We have

$$|\rho_k(i, j)^2 - \theta_k^2| = \frac{\Delta}{|\hat{C}_{ij}C_{ij}|},$$

with

$$\Delta = |C_{ik}C_{jk}\hat{C}_{ij} - \hat{C}_{ik}\hat{C}_{jk}C_{ij}|.$$

Now,

$$\begin{aligned} \Delta &\leq |C_{ik}C_{jk}||\hat{C}_{ij} - C_{ij}| + |C_{ij}\hat{C}_{ik}||\hat{C}_{jk} - C_{jk}| + |C_{ij}C_{jk}||\hat{C}_{ik} - C_{ik}|, \\ &\leq \varepsilon(|C_{ik}C_{jk}| + |C_{ij}\hat{C}_{ik}| + |C_{ij}C_{jk}|), \end{aligned}$$

since  $\|\hat{C} - C\|_\infty \leq \varepsilon$ . We have  $|\hat{C}_{ik}| \leq |C_{ik}| + \varepsilon \leq \phi^2 + \varepsilon \leq 2\phi^2$ , since  $\phi^2 \geq A^2(\theta) \geq \varepsilon$ . Further, using the fact that  $|C_{ik}C_{jk}| \leq \phi^2|C_{ij}|$ , we get  $|C_{ij}C_{jk}| \leq \phi^2|C_{ij}|$ . Replacing, we obtain

$$\Delta \leq 4\phi^2\varepsilon|C_{ij}|$$

and

$$|\rho_k(i, j)^2 - \theta_k^2| = \frac{4\phi^2\varepsilon}{|\hat{C}_{ij}|}.$$

We have

$$\max_{i, j \neq k} |\hat{C}_{ij}| \geq \max_{i, j \neq k} |C_{ij}| - \varepsilon \geq A^2(\theta) - A^2(\theta)/2 = A^2(\theta)/2.$$

Setting  $(i, j) \in \arg \max_{i, j \neq k} |\hat{C}_{ij}|$ , we get the announced result.

□



**Estimation error.** We can now control the estimation error.

**Lemma 7** Assume that  $\|\hat{C} - C\|_\infty \leq \varepsilon \leq A^2(\theta) \min(\frac{1}{2}, \frac{B(\theta)}{64})$  and  $\max_i |\sum_{j \neq i} \hat{C}_{ij} - C_{ij}| \leq \frac{A(\theta)B(\theta)}{8}$ . Then

$$(i) \text{ sign}(\hat{\theta}_{k^*}) = \text{sign}(\theta_{k^*}),$$

$$(ii) \text{ for all } i \text{ such that } |\theta_i| \geq \frac{2\varepsilon}{A(\theta)}, \text{ sign}(\hat{\theta}_i) = \text{sign}(\theta_i),$$

$$(iii) \|\hat{\theta} - \theta\|_\infty \leq \frac{24\varepsilon}{A^2(\theta)}.$$

*Proof.* (i) Let  $u_i = \theta_i^2 + \sum_{j \neq i} C_{ij} = \theta_i B(\theta)$  and  $v_i = \hat{\theta}_i^2 + \sum_{j \neq i} \hat{C}_{ij}$ . We have

$$|u_i - v_i| \leq |\hat{\theta}_i^2 - \theta_i^2| + \left| \sum_{j \neq i} (\hat{C}_{ij} - C_{ij}) \right|.$$

Using Lemma 6,

$$|\hat{\theta}_i^2 - \theta_i^2| \leq \min\left(\frac{\phi^2 B(\theta)}{8}, 4\phi^2\right) \leq \frac{\phi^2 B(\theta)}{8} \leq \frac{\phi B(\theta)}{8}.$$

Further, since  $A(\theta) \leq \phi$ ,

$$\left| \sum_{j \neq i} (\hat{C}_{ij} - C_{ij}) \right| \leq \frac{\phi B(\theta)}{8}.$$

So, for all  $i$ ,

$$|u_i - v_i| \leq \frac{\phi B(\theta)}{4} = \frac{\max_i |u_i|}{4}.$$

Applying Fact 1 statement (i) ensures that  $\text{sign}(\hat{\theta}_{k^*}) = \text{sign}(\theta_{k^*})$ .

(ii) Fact 1 statement (ii) gives  $|\theta_{k^*}| B(\theta) \geq \frac{\phi B(\theta)}{2}$ , so that  $|\theta_{k^*}| \geq \phi/2 \geq A(\theta)/2$ . Consider  $i \neq k^*$  and  $|\theta_i| \geq 2\varepsilon/A(\theta)$ . We have  $|C_{ik^*}| = |\theta_i| |\theta_{k^*}| \geq \varepsilon$  since  $|\theta_{k^*}| \geq A(\theta)/2$ . Since  $|\hat{C}_{ik^*} - C_{ik^*}| \leq \varepsilon$ , we have  $\text{sign}(\hat{C}_{ik^*}) = \text{sign}(C_{ik^*})$ . So  $\text{sign}(\hat{\theta}_i) = \text{sign}(\theta_i)$  which proves the second claim.

(iii) We have:

$$|\hat{\theta}_i - \theta_i| \leq |\hat{\theta}_i| + |\theta_i| + 2|\theta_i| \mathbf{1}\{\text{sign}(\theta_i) \neq \text{sign}(\hat{\theta}_i)\} \leq \frac{20\varepsilon}{A^2(\theta)} + \frac{4\varepsilon}{A(\theta)} \leq \frac{24\varepsilon}{A^2(\theta)}.$$

where we applied the previous statement and Lemma 5.  $\square$

**Proof of Theorem 2.** Let  $\theta \in \Theta_{a,b}$ ,  $\epsilon \in (0, \min(b/3, 1))$  and assume that the following two events occur:

$$\left\{ \|\hat{C} - C\|_\infty \leq \frac{\epsilon A^2(\theta)}{24} \right\} \text{ and } \left\{ \max_{i=1, \dots, n} \left| \sum_{j \neq i} (\hat{C}_{ij} - C_{ij}) \right| \leq \frac{A(\theta)B(\theta)}{8} \right\}.$$

We may readily check that

$$\frac{\epsilon A^2(\theta)}{24} \leq \frac{A^2(\theta)}{24} \min\left(\frac{b}{3}, 1\right) \leq \frac{A^2(\theta)}{24} \min\left(\frac{B(\theta)}{3}, 1\right) \leq A^2(\theta) \min\left(\frac{B(\theta)}{64}, \frac{1}{2}\right).$$

Thus Lemma 7 guarantees that  $\|\hat{\theta} - \theta\|_\infty \leq \epsilon$ . By a union bound,

$$\mathbb{P}(\|\hat{\theta} - \theta\|_\infty \geq \epsilon) \leq \mathbb{P}\left(\|\hat{C} - C\|_\infty \geq \frac{\epsilon A^2(\theta)}{24}\right) + \sum_{i=1}^n \mathbb{P}\left(\left| \sum_{j \neq i} (\hat{C}_{ij} - C_{ij}) \right| \geq \frac{A(\theta)B(\theta)}{8}\right).$$

Now let  $t \geq \max(T'_1, T'_2)$  with  $c'_1 = 120 \times 24^2$  and  $c'_2 = 30 \times 8^2$ . Applying Lemma 2,

$$\mathbb{P}\left(\|\hat{C} - C\|_\infty \geq \frac{\epsilon A^2(\theta)}{24}\right) \leq 3n^2 \exp\left(-\frac{\epsilon^2 A^4(\theta) \alpha^2 t}{120 \times 24^2}\right) \leq \frac{\delta}{2}.$$

Applying Lemma 2 once again, we get

$$\mathbb{P} \left( \left| \sum_{j \neq i} (\hat{C}_{ij} - C_{ij}) \right| \geq \frac{A(\theta)B(\theta)}{8} \right) \leq 2 \exp \left( -\frac{A(\theta)^2 B(\theta)^2 \alpha^2 t}{30 \times 8^2 \max(B(\theta)^2, n)} \right) + 2n \exp \left( -\frac{t \alpha^2}{8(n-1)} \right).$$

Since

$$\frac{A(\theta)^2 B(\theta)^2 \alpha^2 t}{30 \times 8^2 \max(B(\theta)^2, n)} \geq \frac{a^2 \alpha^2 t}{30 \times 8^2} \max \left( 1, \frac{b^2}{n} \right) \geq \ln \left( \frac{4n^2}{\delta} \right)$$

and

$$\frac{t \alpha^2}{8(n-1)} \geq \ln \left( \frac{4n^2}{\delta} \right),$$

we get

$$\mathbb{P} \left( \left| \sum_{j \neq i} (\hat{C}_{ij} - C_{ij}) \right| \geq \frac{A(\theta)B(\theta)}{8} \right) \leq \frac{\delta}{n^2},$$

and summing we get  $\mathbb{P}(\|\hat{\theta} - \theta\|_\infty \geq \epsilon) \leq \delta$  as announced.  $\square$

### 3 Upper bounds: relation with prior work

Consider  $n \geq 5$ ,  $a = 1/2$ ,  $b = \frac{\sqrt{n-4}}{2}$  and  $\theta = (a, -a, a, -a, \frac{b}{n-4}, \dots, \frac{b}{n-4})$ . We have  $\max_i |\theta_i| \leq \frac{1}{2}$ .

For Theorem 4 of Zhang et al. [2014] to hold, one requires the following inequality to be satisfied:

$$n \geq c_4 \frac{\ln(tn/\delta)}{\overline{D}}$$

where  $c_4 > 0$  is a universal constant and:

$$\overline{D} = \frac{1}{n} \sum_{i=1}^n \text{KL} \left( \frac{1+\theta_i}{2}, \frac{1-\theta_i}{2} \right),$$

where  $\text{KL}(p, q)$  denotes the Kullback-Leibler divergence between Bernoulli distributions with parameters  $p$  and  $q$ . From inequality  $\ln(z) \leq z - 1$ , we have  $\text{KL}(p, q) \leq \frac{(p-q)^2}{q(1-q)}$  for all  $p, q$  in  $(0, 1)$ . Since  $\max_i |\theta_i| \leq 1/2$  we get:

$$\overline{D} \leq \frac{16}{3n} \sum_{i=1}^n \theta_i^2 = \frac{20}{3n}.$$

Therefore  $n$  must satisfy  $n \geq c_4(3n/20) \ln(tn/\delta)$  and there can exist no such  $n$  when  $t$  or  $1/\delta$  are sufficiently large.

### References

- Alexandre B. Tsybakov. *Introduction to non-parametric estimation*. Springer, 2008.
- Yuchen Zhang, Xi Chen, Dengyong Zhou, and Michael I Jordan. Spectral methods meet EM: A provably optimal algorithm for crowdsourcing. In *Proc. of NIPS*, <http://arxiv.org/abs/1406.3824>, 2014.
